# Supplementary material
Source: Royal Society of Chemistry journal article supplement (doi:10.1039/d6sm00026f)
Supplement: d6sm00026f3.pdf [file d6sm00026f3.pdf]

## Supplementary Material

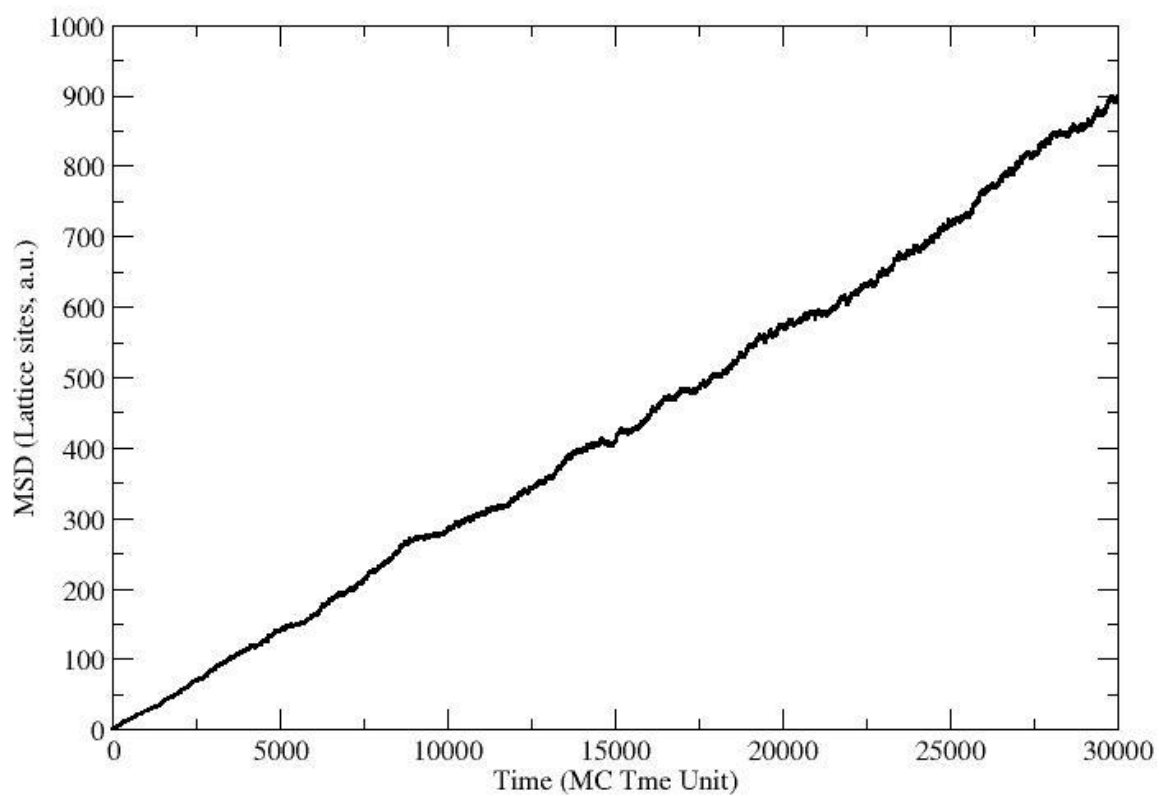

**Fig. S1:** Mean square displacement of a single protein in a 35DPPC ternary mixture.
